# Supplementary material for: Dual-emissive Polymer Dots for Rapid Detection of Fluoride in Pure Water and Biological Systems with Improved Reliability and Accuracy
Source: PubMed Central journal article supplement (PMC4639760; doi:10.1038/srep16420), 2015-11-10
Supplement: srep16420-s1.pdf [file srep16420-s1.pdf]

## Supporting Information

### **Dual-emissive Polymer Dots for Rapid Detection of Fluoride in Pure Water and Biological Systems with Improved Reliability and Accuracy**

Qiang Zhao<sup>1,\*</sup>, Chuanqi Zhang<sup>1</sup>, Shujuan Liu<sup>1</sup>, Yahong Liu<sup>1</sup>, Kenneth Yin Zhang<sup>1</sup>, Xiaobo Zhou<sup>1</sup>, Jiayang Jiang<sup>1</sup>, Wenjuan Xu<sup>1</sup>, Tianshe Yang<sup>1</sup>, and Wei Huang<sup>2,\*</sup>

<sup>1</sup>Key Laboratory for Organic Electronics and Information Displays & Institute of Advanced Materials (IAM), Jiangsu National Synergetic Innovation Center for Advanced Materials (SICAM), Nanjing University of Posts & Telecommunications, 9 Wenyuan Road, Nanjing 210023, China.

<sup>2</sup>Key Laboratory of Flexible Electronics (KLOFE) & Institute of Advanced Materials (IAM), Jiangsu National Synergetic Innovation Center for Advanced Materials (SICAM), Nanjing Tech University (NanjingTech), 30 South Puzhu Road, Nanjing 211816, China.

\*iamqzhao@njupt.edu.cn ; wei-huang@njtech.edu.cn

## 1. Synthesis

The ligands and Ir(III) complexes were synthesized according to the route depicted in Fig. S1.

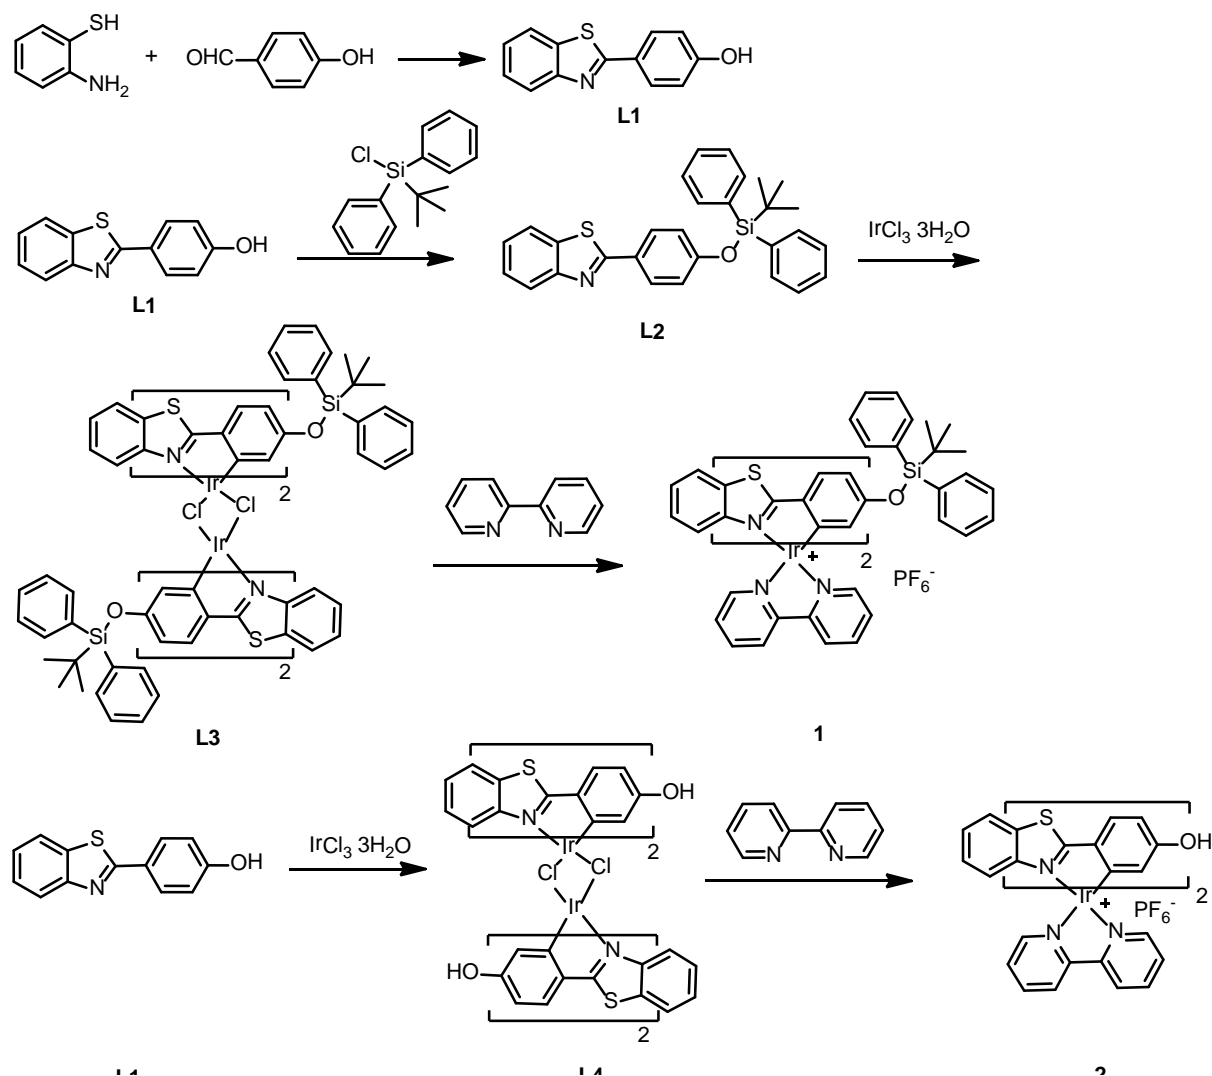

**Figure S1.** Synthesis of the ligands **L1** and **L2**, and their Ir(III) complexes **1** and **2**.

**Synthesis of L1:** The N,N-dimethylformamide (5.0 mL) was added to a flask containing 2-aminothiophenol (4.0 g) and 4-hydroxybenzaldehyde (4.12 mL). The mixture was refluxed for 72 h and the temperature of the reaction system was raised to 110 °C. Then, the reaction was extracted with water and ethyl acetate. The solvents were evaporated in vacuum and the product was recrystallized from ethanol. Yield: 80%. <sup>1</sup>H NMR (400 MHz, d<sub>6</sub>-DMSO) δ:

10.21 (s, 1H), 8.07 (d, J = 7.9 Hz, 1H), 8.00 - 7.87 (m, 3H), 7.53 - 7.45 (m, 1H), 7.43 - 7.33 (m, 1H), 6.97 - 6.88 (m, 2H).

**Synthesis of L2:** The N,N-dimethylformamide (5.0 mL) was added to a flask containing tert-butyl(chloro)- diphenylsilane (2.0 mL), imidazole (200 mg) and **L1** (1 g). The mixture was refluxed for 24 h under nitrogen. Then the reaction was extracted with water and ethyl acetate. The solvents were evaporated in vacuum and the product was recrystallized from ethanol. Yield: 80%. <sup>1</sup>H NMR (400 MHz, d<sub>6</sub>-DMSO) δ: 6.91 - 6.86 (dd, 2H), 7.51 - 7.39 (m, 8H), 1.05 (s, 9H), 7.71 - 7.66 (m, 4H), 7.96 - 7.79 (d, J = 7.8 Hz, 1H), 8.09 - 8.04 (d, 1H), 7.91 - 7.86 (m, 2H).

**Synthesis of L3:** A mixture of 2-ethoxyethanol and water (3:1, v/v) was added to a flask containing IrCl<sub>3</sub>·3H<sub>2</sub>O (1 mmol) and ligand **L2** (2.5 mmol). The mixture was refluxed for 24 h. After cooling down, the red solid precipitate was filtered and washed with ethanol to give crude cyclometalated Ir(III) chloro-bridged dimer.

**Synthesis of 1:** The solution of cyclometalated Ir(III) chloro-bridged dimer **L3** (200 mg) and 2,2'-bipyridine (64 mmol) in CH<sub>2</sub>Cl<sub>2</sub>/MeOH [30 mL, 2:1 (v/v)] was heated to reflux. After 4 h, the red solution was cooled down to room temperature and then a 5-fold excess of potassium hexafluorophosphate was added. The suspension was stirred for 1 h and then was filtered to remove insoluble inorganic salts. The solution was evaporated to dryness under reduced pressure. It was chromatographed by using CH<sub>2</sub>Cl<sub>2</sub>/acetone (30:1) to afford red solid in a 60% yield. <sup>1</sup>H NMR (400 MHz, d<sub>6</sub>-DMSO) δ: 8.70 (d, J = 8.3, 2H), 8.22 (dd, 2H), 7.89 (d, J = 8.0, 2H), 7.77 (d, J = 8.3, 2H), 7.66 (dd, J = 7.1, 2H), 7.56 (d, J = 5.1, 2H), 7.59 - 7.32 (dd, 4H), 7.22 - 7.15(m, J = 24.18H), 6.83 (dd, 2H), 6.73 (dd, J = 8.4, 2H), 5.60 (d, J = 2.1, 2H), 5.45 (d, J = 8.4, 2H), 1.0 - 0.71 (s, 18H). <sup>13</sup>C NMR (100 MHz, d<sub>6</sub>-DMSO, δ):180.08,

158.22, 156.27, 153.02, 150.25, 141.01, 138.34, 135.18, 134.08, 131.86, 130.77, 129.12, 127.50, 124.70, 115.90, 60.418, 58.49, 31.46, 29.53, 26.21, 22.07, 19.34, 14.32. MS (MALDI-TOF -MS) [m/z]: 1277.634 (4-PF6)<sup>+</sup>.

**Synthesis of L4:** A mixture of 2-ethoxyethanol and water (3:1, v/v) was added to a flask containing IrCl<sub>3</sub>·3H<sub>2</sub>O (1 mmol) and **L1** (2.5 mmol). The mixture was refluxed for 24 h. After cooling down, the red solid precipitate was filtered and washed with ethanol to give crude cyclometalated Ir(III) chloro-bridged dimer.

**Synthesis of 2:** The solution of cyclometalated Ir(III) chloro-bridged dimer **L4** (200 mg) and 2,2'-bipyridine (50 mg) in CH<sub>2</sub>Cl<sub>2</sub>/CH<sub>3</sub>OH [30 mL, 2:1 (v/v)] was heated to reflux. After 4 h, the red solution was cooled down to room temperature and then a 10-fold excess of potassium hexafluorophosphate was added. The suspension was stirred for 2 h and then was filtered to remove insoluble inorganic salts. The solution was evaporated to dryness under reduced pressure. It was chromatographed by using CH<sub>2</sub>Cl<sub>2</sub>/acetone (20:1) to afford red solid in a 60% yield. <sup>1</sup>H NMR (400 MHz, d<sub>6</sub>-DMSO) δ: 9.85 (s, 2H), 8.80 (d, J = 8.2 Hz, 1H), 8.33 - 8.24 (m, 1H), 8.11 m, J = 6.1 Hz, 2H), 7.84 (d, J = 8.4 Hz, 1H), 7.82 - 7.74 (m, 1H), 7.30 (m, J = 7.7 Hz, 1H), 7.07 (m, J = 7.8 Hz, 1H), 6.53 (dd, J = 8.4, 2.2 Hz, 1H), 5.94 (d, J = 8.4 Hz, 1H), 5.74 (s, 2H).

The CPEs and its procedure were synthesized according to the route depicted in Fig. S2.

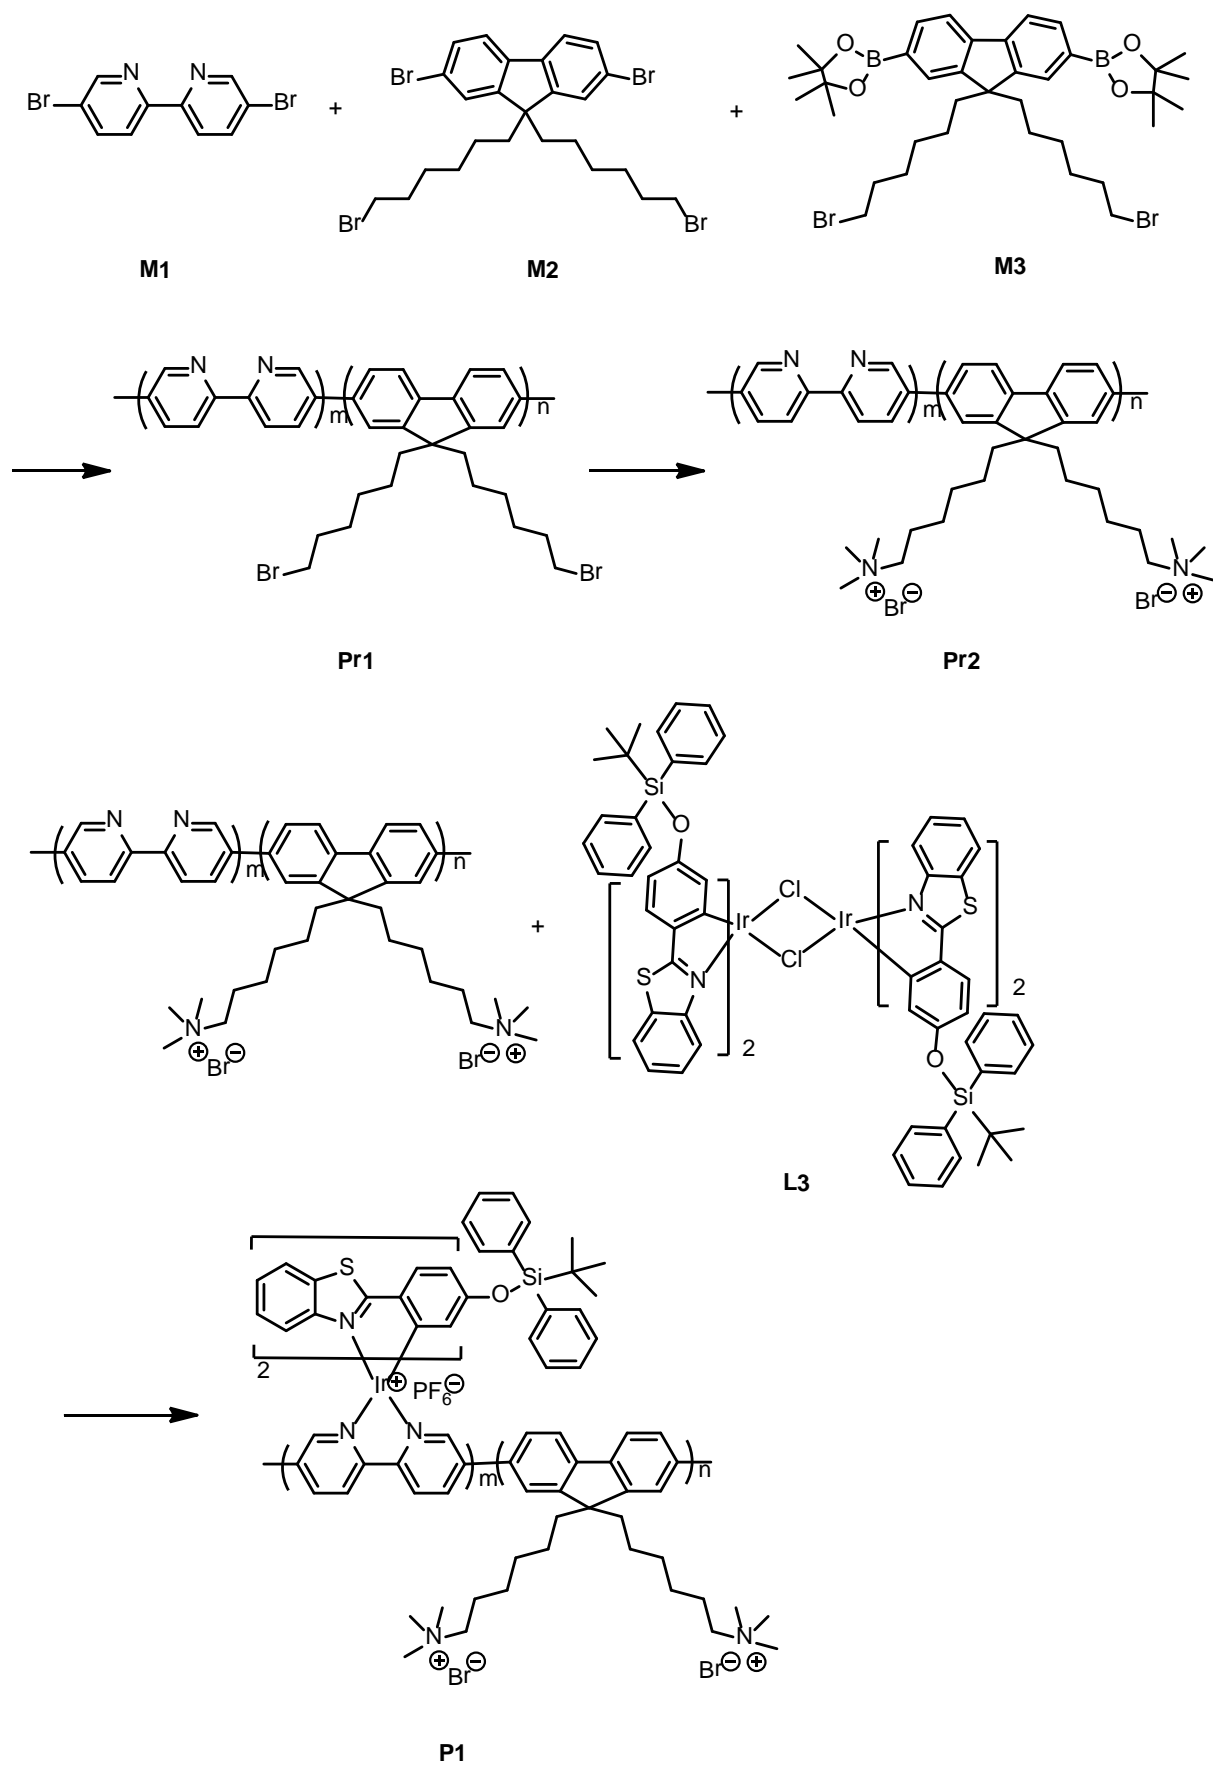

**Figure S2.** The synthetic routes of the CPEs.

Synthesis of **M1**, **M2** and **M3**: The monomers **M1**, **M2** and **M3** were synthesized according to the previous reports.<sup>1-3</sup>

The detail of synthetic of **P1** was stated in the methods part of the article.

## 2. Absorption spectra

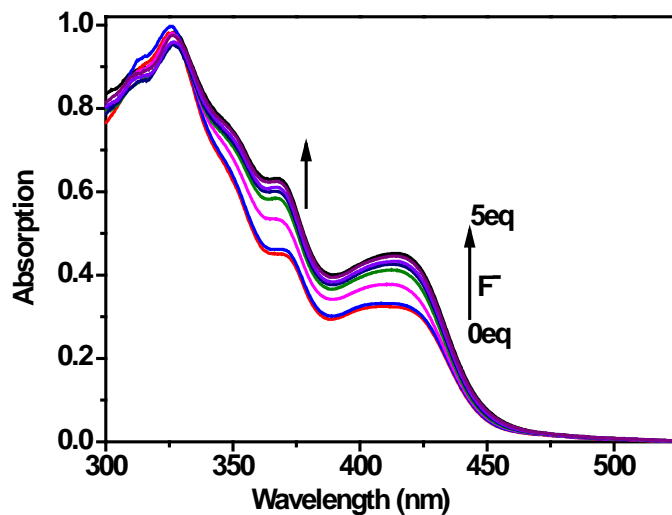

**Figure S3.** The response of absorption spectra of complex 1 to different concentrations of F- (with the addition of F- from 0 to 5-fold equivalents). The concentration of complex 1 was  $1.26 \times 10^{-4}$  mol/L. The test was carried out in tetrahydrofuran.

## 3. Mass spectra

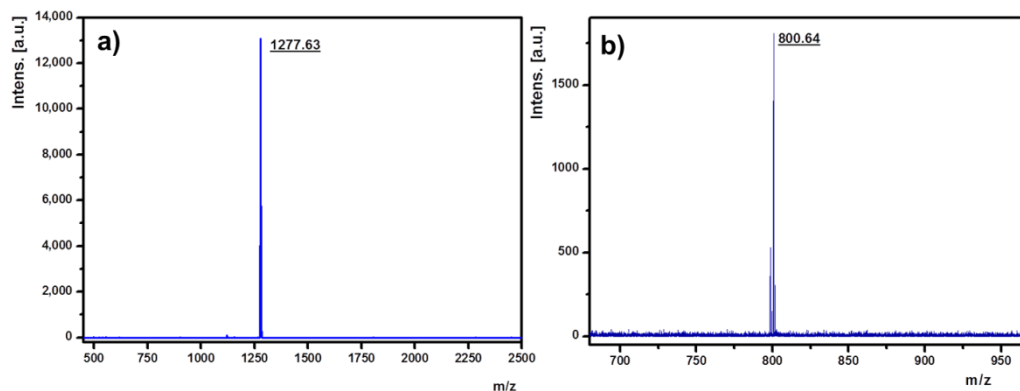

**Figure S4.** The mass spectra of compound 1 before (a) and after (b) addition of F<sup>-</sup>.

#### 4. Time-dependent PL spectra

The time-dependent PL spectrum of compound 1 with saturation concentrations of  $F^-$  was shown in Fig. S5. It can be seen that there is almost no time-dependent effects in the PL sensing process, and the emission intensity reaches to its saturation value within 60 seconds due to the rapid deprotection reaction.

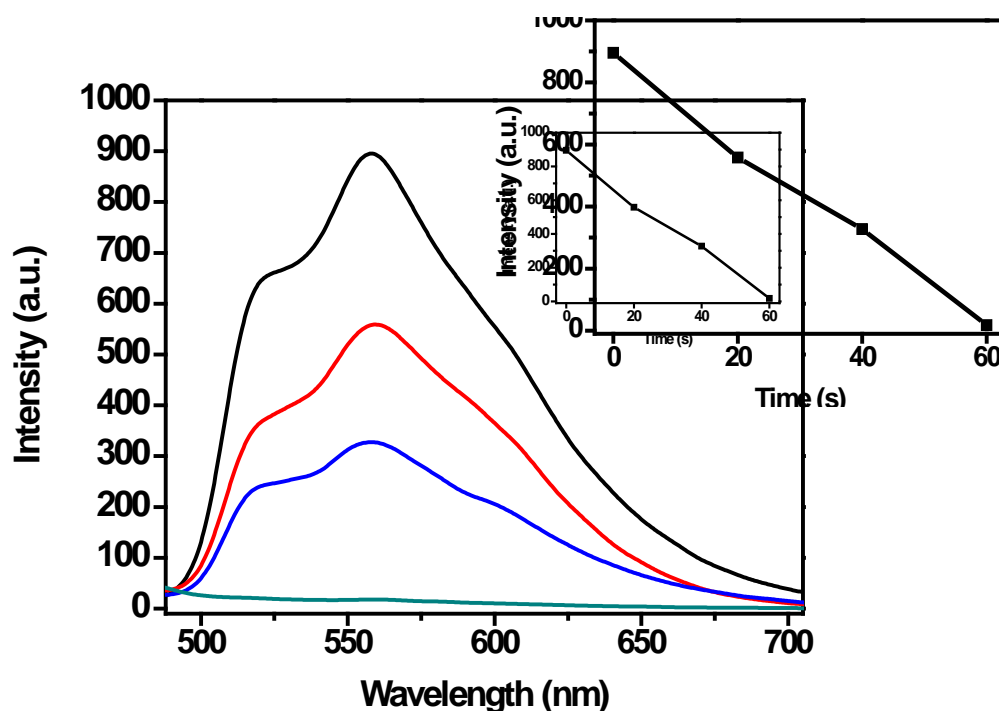

**Figure S5.** The time-dependent PL spectrum of compound 1 with saturation concentrations of  $F^-$ .

#### 5. Ion selective response

Upon screening of a large variety of common anions, such as  $CO_3^{2-}$ ,  $HSO_4^-$ ,  $NO_2^-$ ,  $NO_3^-$ ,  $CH_3COO^-$ ,  $HSO_3^-$ ,  $HCO_3^-$ ,  $Cl^-$ ,  $Br^-$ , and  $F^-$ , probe 1 only exhibited significantly decreased emission (at 565 nm) in the presence of  $F^-$ . Other anions did not trigger any significant enhancement or disturb the response toward  $F^-$ .

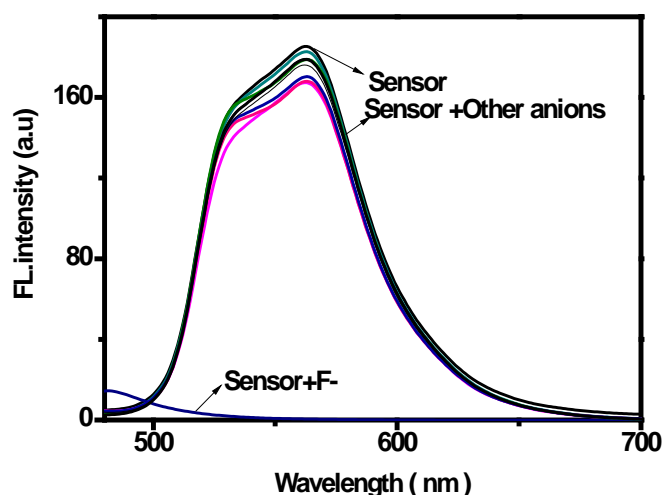

**Figure S6.** PL spectra ( $\lambda_{\text{ex}} = 370 \text{ nm}$ ) of complex **1** ( $20 \mu\text{M}$ ) in the presence of 40 equivalents of various anions ( $\text{CO}_3^{2-}$ ,  $\text{HSO}_4^-$ ,  $\text{NO}_2^-$ ,  $\text{NO}_3^-$ ,  $\text{CH}_3\text{COO}^-$ ,  $\text{HSO}_3^-$ ,  $\text{HCO}_3^-$ ,  $\text{Cl}^-$ ,  $\text{Br}^-$ , and  $\text{F}^-$ ) in THF.

## 6. Confocal images

To demonstrate the potential of the probe **1** in cellular sensing and imaging, the confocal images of living KB cells after incubation with probe **1** in PBS buffer for 60 min at  $37 \text{ }^\circ\text{C}$ . Then the experimental group was further incubated with  $\text{F}^-$  ( $20 \mu\text{M}$ ) for 30 min at  $37 \text{ }^\circ\text{C}$ , and the control group was directly incubated for 90 min. We used confocal luminescence imaging to demonstrate the feasibility of the probe for  $\text{F}^-$  detection. The emission collected at 500-600 nm (B and E). As shown in the Fig. S5, after incubated with  $\text{F}^-$ , the luminescence was significantly decreased, indicating that the probe exhibits good performances for  $\text{F}^-$  sensing and imaging.



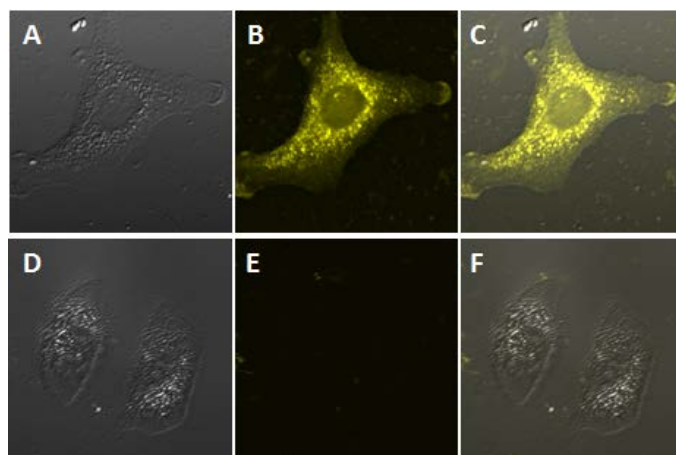

**Figure S7.** Confocal images of KB cell in the presence of the probe before (A-C) and after (D-F) incubated with  $F^-$ . Excitation wavelength was 405 nm; The A and D were bright-field, B and E was collected at 500-600 nm, and C and F were the overlay images. All the images share the same bar of 20  $\mu\text{m}$ .

### 7. Sensing performance of 1 and P1 under different pH values

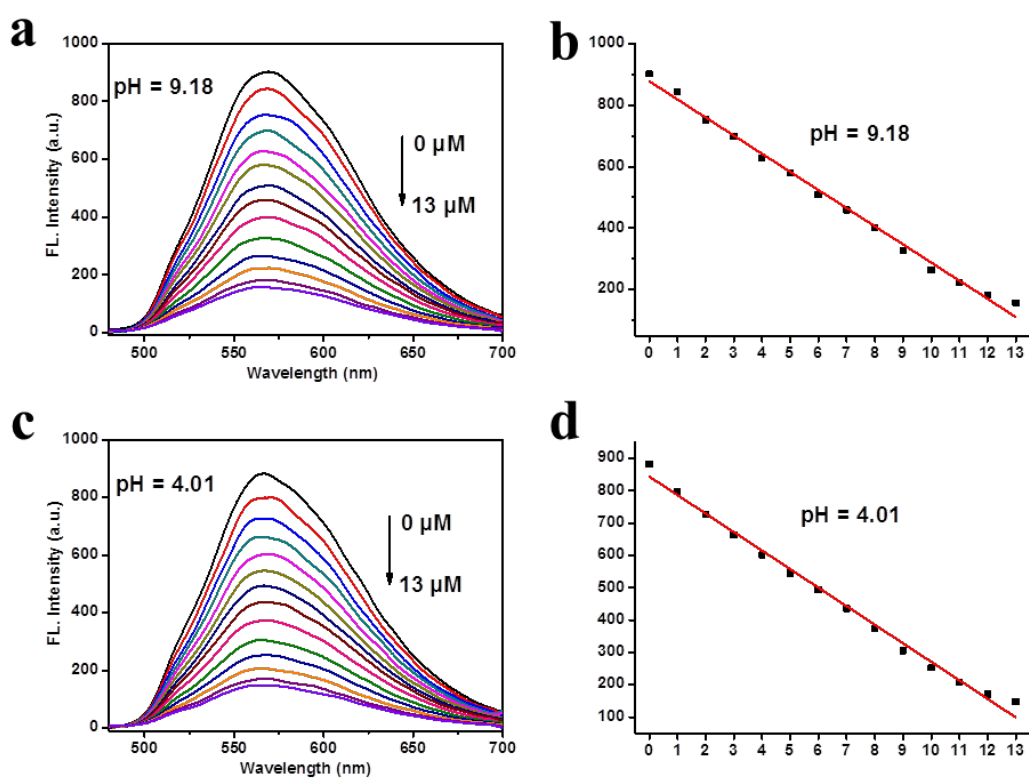

**Figure S8.** (a) PL spectra of complex **1** in sodium tetraborate solution (ST, pH=9.18) with addition of F<sup>-</sup> from 0 to 13 μM upon excitation at 365 nm. (b)  $I_{600}/I_{420}$  as a function of [F<sup>-</sup>] and its trendline in ST buffer solution. (c) PL spectra of complex **1** in potassium hydrogen phthalate solution (PHP, pH=4.00) with addition of F<sup>-</sup> from 0 to 13 μM upon excitation at 365 nm. (d)  $I_{600}/I_{420}$  as a function of [F<sup>-</sup>] and its trendline in PHP buffer solution.

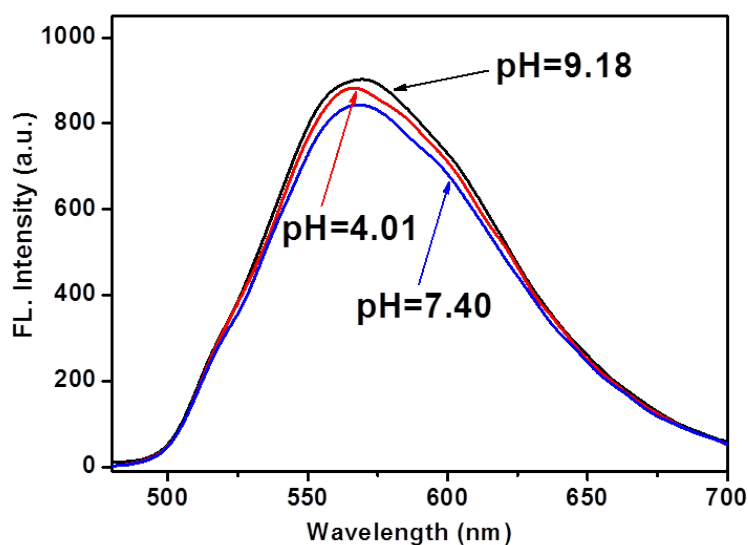

**Figure S9.** PL spectra of complex **1** in different pH buffer solution without the addition of F<sup>-</sup>.

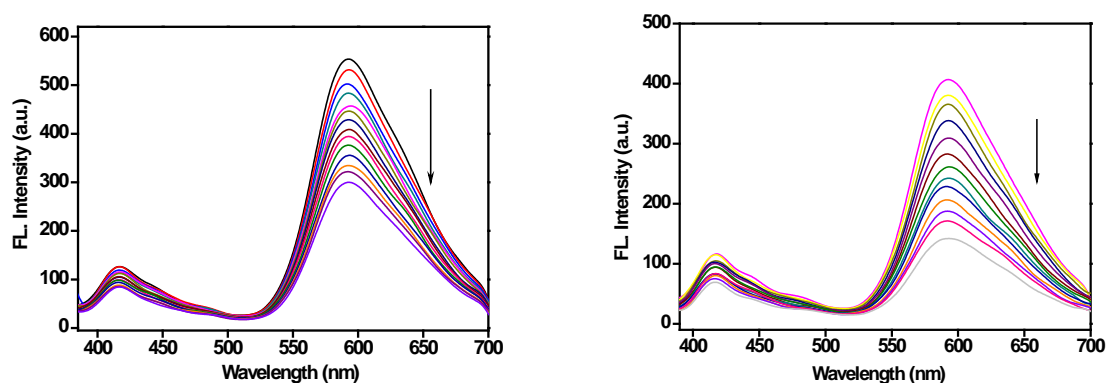

**Figure S10.** PL spectra of **P1** in aqueous solution under pH = 4.01 (left) or 9.18 (right) with addition of F<sup>-</sup> from 0 to 13 μM upon excitation at 365 nm.

## 8. $^1\text{H}$ NMR

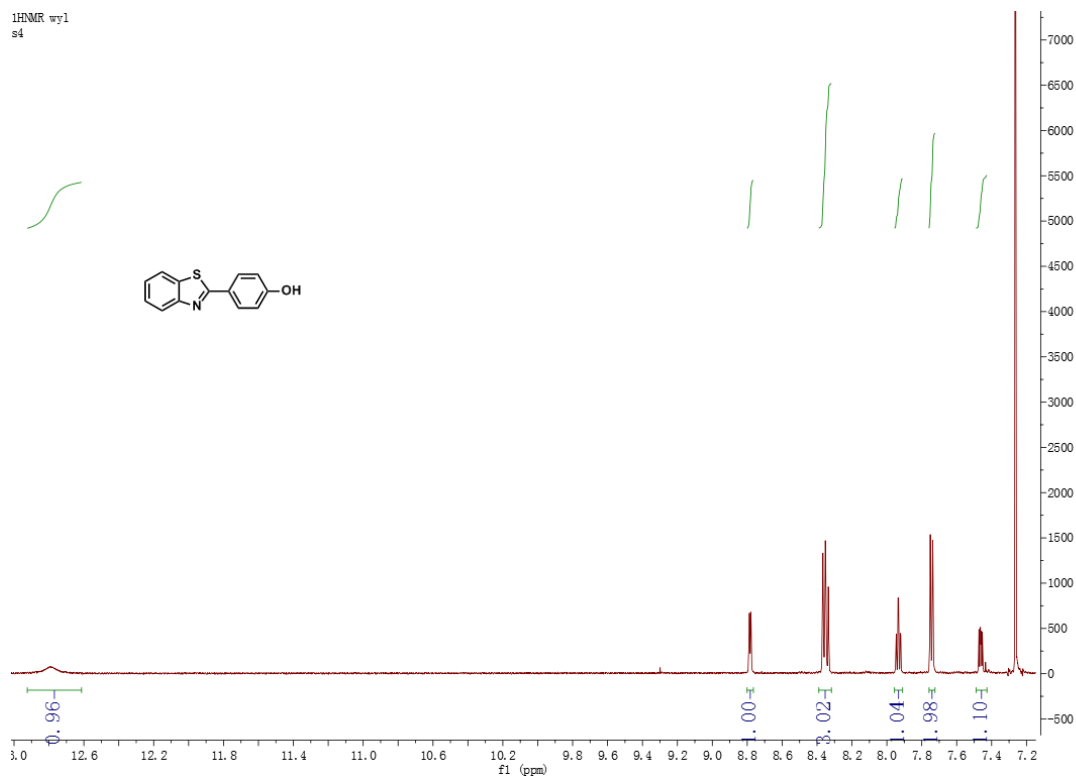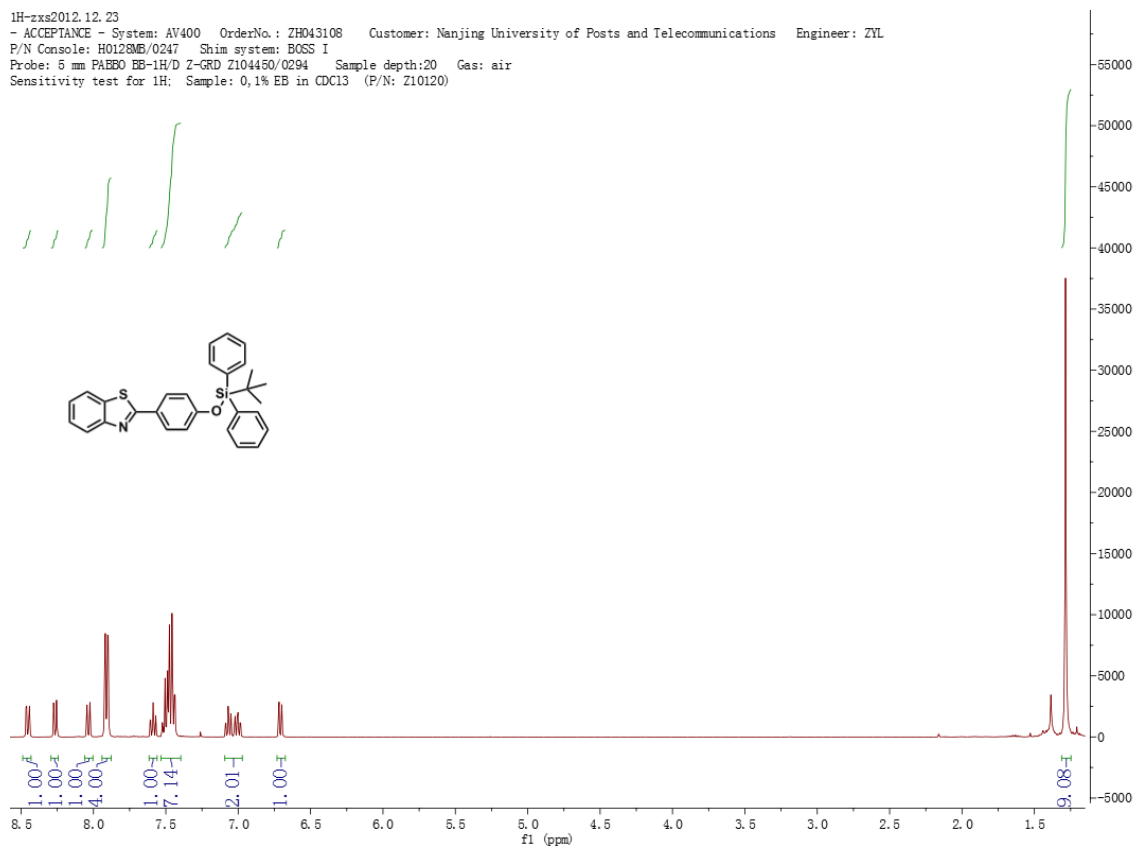

1H-qiangi  
 - ACCEPTANCE - System: AV400 OrderNo.: ZH043108 Customer: Nanjing University of Posts and Telecommunications Engineer: ZYL  
 P/N Console: H0128ME/0247 Shim system: BOSS I  
 Probe: 5 mm PABBO EB-1H/D Z-GRD Z104450/0294 Sample depth:20 Gas: air  
 Sensitivity test for 1H: Sample: 0,1% EB in CDCl3 (P/N: Z10120)

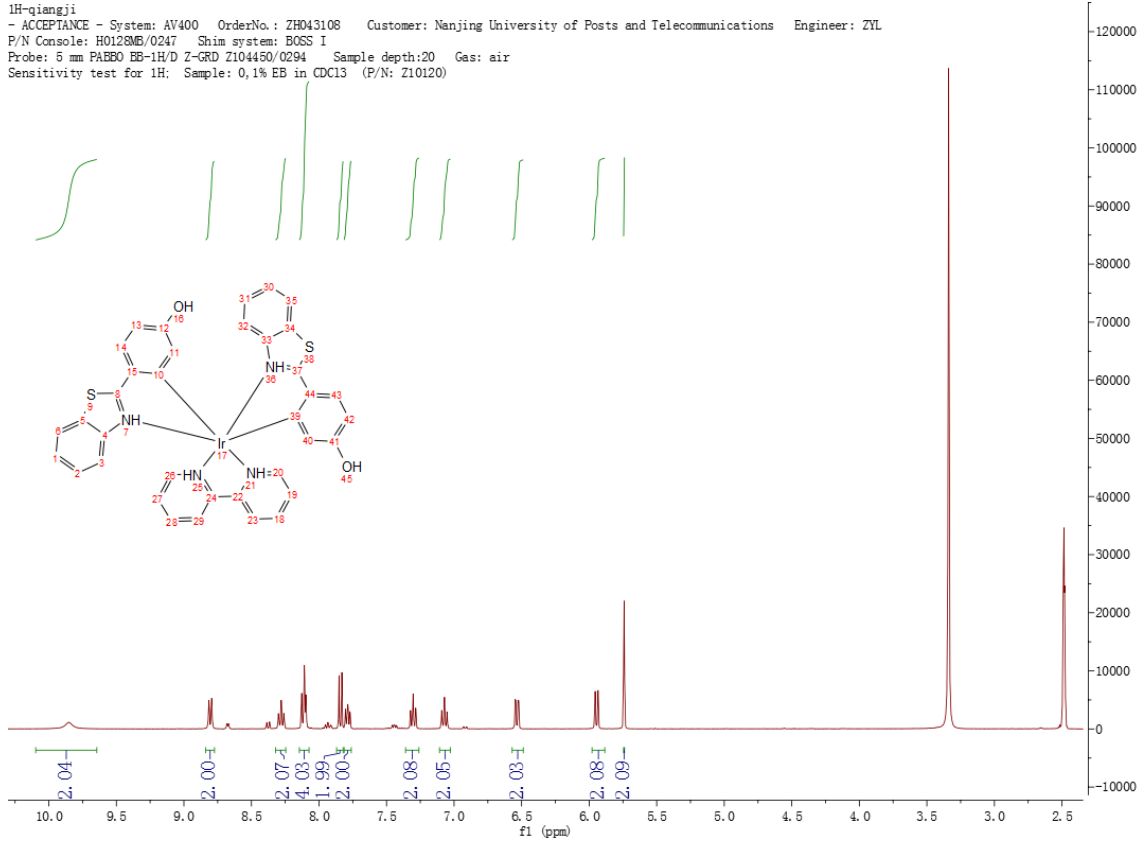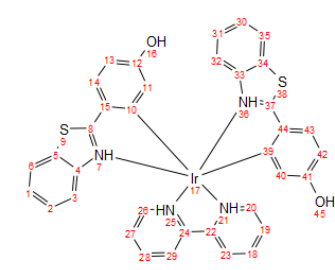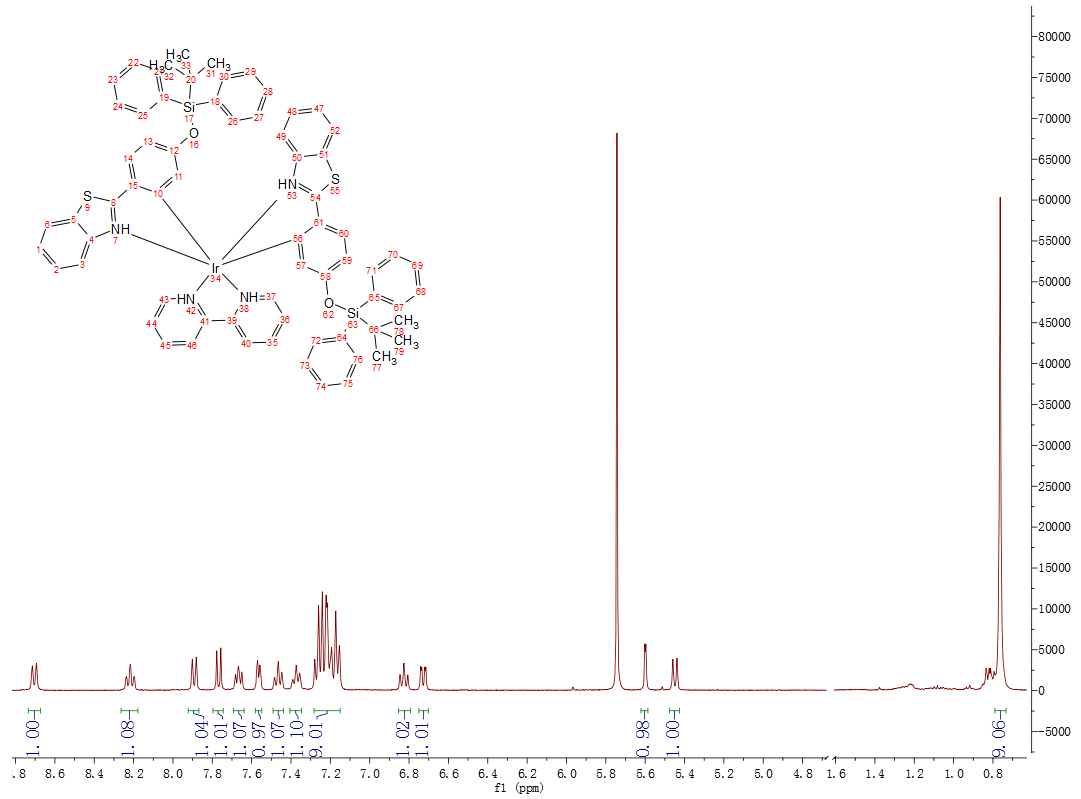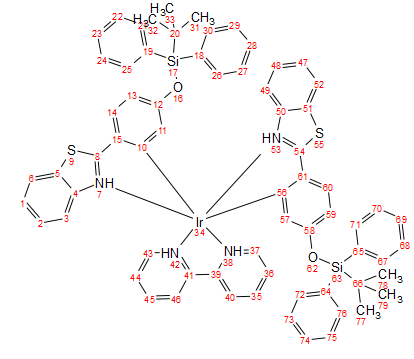

## 9. References

1. Newkome, G. R., Patri, A. K., Holder, E. & Schubert, U. S. Synthesis of 2,2'-bipyridines: Versatile building blocks for sexy architectures and functional nanomaterials. *Eur. J. Org. Chem.* **2**, 235-254 (2004).
2. Shi, H. F. et al. Simple Conjugated Polymers with On-Chain Phosphorescent Iridium(III) Complexes: Toward Ratiometric Chemodosimeters for Detecting Trace Amounts of Mercury(II). *Chem. Eur. J.* **16**, 12158-12167 (2010).
3. Liu, B. & Bazan, G. C. Synthesis of cationic conjugated polymers for use in label-free DNA microarrays. *Nat. Protoc.* **1**, 1698-1702 (2006).
